# Supplementary material
Source: PubMed Central journal article supplement (PMC7533042)
Supplement: NIHMS1631119-supplement-Supplementary_materials.pdf [file NIHMS1631119-supplement-Supplementary_materials.pdf]

# The $\beta$ -secretase BACE1 in Alzheimer's Disease

## SUPPLEMENTAL INFORMATION

### Supplemental Tables

**Supplemental Table S1. Studies on BACE1 candidate biomarkers in body fluids**

| BACE1 parameter(s)         | Study population                          | Matrix    | Outcome/interpretation                                                         | Reference |
|----------------------------|-------------------------------------------|-----------|--------------------------------------------------------------------------------|-----------|
| Activity (comm)            | 31 AD                                     | CSF       | BACE1 correlates with brain amyloid load                                       | (1)       |
| Activity (Wu G)            | 99 HC, 87 MCI, 79 AD                      | CSF       | No significant differences                                                     | (2)       |
| Activity (Wu G)            | 48 HC, 39 sMCI, 76 MCI-AD, 56 AD          | CSF       | Increase BACE1 in MCI due to AD                                                | (3)       |
| Activity (Wu G)            | 33 HC, 45 MCI-AD, 52 sMCI, 16 cMCI, 87 AD | CSF       | Increased BACE1 in incipient AD                                                | (4)       |
| Activity (Wu G)            | 65 HC, 75 AD                              | CSF       | AD patients in advanced clinical stage had decreased BACE1 levels              | (5)       |
| Activity (Wu G)            | 106 HC, 183 MCI, 92 AD                    | CSF       | No difference                                                                  | (6)       |
| Activity and concentration | 59 HC, 59 MCI, 80 AD                      | CSF       | BACE1 is a predictor of MCI                                                    | (7)       |
| Activity and concentration | 37 HC, 51 MCI, 60 AD                      | CSF       | Increased BACE1 activity in APOE $\epsilon$ 4 carriers                         | (8)       |
| Activity and concentration | 19 HC, 28 AD                              | CSF       | BACE1 associated with decreased HV                                             | (9)       |
| Activity                   | 12 HC, 18 MCI, 17 AD                      | CSF       | Subjects with an AD-like biomarker profile had higher BACE1 level              | (10)      |
| Concentration              | 31HC, 6 MCI, 53 AD                        | CSF       | Increased BACE1 levels are correlated with tau                                 | (11)      |
| Concentration              | 20 HC, 38 MCI, 50 AD                      | CSF       | BACE1 correlates with neurogranin and neurogranin /BACE has prognostic value   | (12)      |
| Concentration              | 38 HC                                     | CSF       | Chronic BACE1 inhibition did not influence BACE1 levels                        | (13)      |
| Concentration              | 38 HC                                     | CSF       | BACE1 correlates with neurogranin, $\alpha$ -synuclein and precuneus pathology | (14)      |
| Activity and concentration | 28 HC, 34 MCI, 45 AD                      | platelets | Increased BACE1 in AD platelets not in MCI                                     | (15)      |

| <b>BACE1 parameter(s)</b>       | <b>Study population</b> | <b>Matrix</b>        | <b>Outcome/interpretation</b>                               | <b>Reference</b> |
|---------------------------------|-------------------------|----------------------|-------------------------------------------------------------|------------------|
| Concentration                   | 12 HC, 15 AD            | plasma and platelets | Reduced platelet BACE1 levels in AD no difference in plasma | (16)             |
| Concentration                   | 44 HC, 19 MCI, 68 AD    | platelets            | Increased BACE1 levels only in AD patients                  | (17)             |
| Activity                        | 115 HC, 86 AD           | platelets            | Increased BACE1 activity in AD patients                     | (18)             |
| Activity                        | 85 HC, 97 MCI           | plasma               | No change in BACE1 activity in MCI                          | (19)             |
| Activity and concentration (WB) | 53 HC, 96 MCI, 75 AD    | plasma               | Increased BACE1 in plasma from MCI and AD patients          | (20)             |
| Concentration                   | 32 non-AD, 47 AD        | plasma               | Increased BACE1 in plasma of AD patients                    | (21)             |

**Abbreviations:** Comm: commercial; WB: Western-blot; CSF: cerebral spinal fluid; MCI: Mild Cognitive Impairment; AD: Alzheimer's disease; HC: healthy controls; sMCI: stable MCI; cMCI: converters MCI. **Notes:** Wu G refers to the description of the BACE1 activity assay: Wu G et al, Clin Biochem 2008; 41: 986.

**Supplemental Table S2. BACE1 null phenotypes in the Central Nervous System**

| <b>Phenotype</b>                             | <b>Substrate</b> |
|----------------------------------------------|------------------|
| Astrogenesis increase, neurogenesis decrease | Jag1             |
| Axon guidance defects                        | CHL1             |
| Hyperactivity                                | NRG1             |
| Hypomyelination                              | NRG1             |
| Memory deficits                              | –                |
| Neurochemical deficits                       | –                |
| Neurodegeneration w/ age                     | Nav $\beta$ 2    |
| Post-natal lethality, growth retardation     | –                |
| Retinal pathology                            | VEGFR1           |
| Schizophrenia endophenotypes                 | NRG1             |
| Seizures                                     | Nav $\beta$ 2    |
| Spine density reduction                      | NRG1             |

**Abbreviations:** Jag1: Jagged-1; NRG1: neuregulin-1, SEZ6: seizure-related protein 6, CHL1: neural cell adhesion molecule L1, VEGFR1: Vascular endothelial growth factor receptor 1, Nav $\beta$ 2: Voltage-gated sodium channels beta 2.

## Supplemental Figures

**Supplemental Figure S1. Schematic representation of a biomarker-drug co-development program**

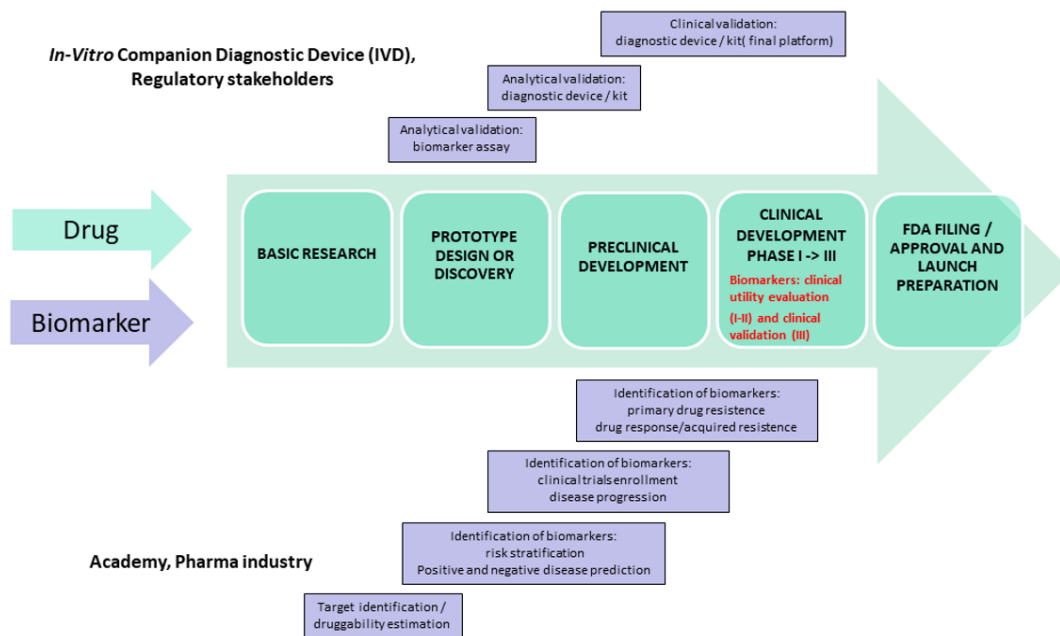

Ideally, biomarkers should be carried through all phases of drug development and validated and qualified in agreement with regulators.

The picture shows one possible model for biomarker-drug co-development program: a regulatory scenario for a single test that would be used in conjunction with a single drug in the clinical management of a patient. The figure highlights key events for both the diagnostic test and drug regulation with overall coordination of the regulatory processes governing them so that the products launch together [Adapted from Hampel H et al. Biomarker-Drug and Liquid Biopsy Co-development for Disease Staging and Targeted Therapy: Cornerstones for Alzheimer's Precision Medicine and Pharmacology. *Front Pharmacol.* 2019 Mar 29;10:310].

## Supplemental Description Of Previous Clinical Trials With Bace1 Inhibitors

### HUMAN CLINICAL TRIALS WITH BACE1 INHIBITORS: a brief overview

All BACE inhibitors, investigated in RCT, were discontinued for either futility or safety reasons.

A Phase 3, trial of verubecestat (12 or 40 mg/day) conducted in mild-to-moderate AD patients (EPOCH) was terminated due to futility(22). The Phase 3 study of the same compound and dose regimens, investigated in prodromal AD, reported cognitive and functional worsening as well as higher rates of anxiety and depressive symptoms(22) in 40-mg verubecestat group compared with the placebo group. The former group also showed faster reduction of brain volumes compared with the placebo(22).

A Phase 2/3, trial of atabecestat (5 or 25 mg/day) investigated in asymptomatic A $\beta$ -positive individuals at risk of AD (EARLY), was discontinued at the enrolment phase out of liver toxicity(23). Analysis of data gathered showed that the high-dose group was associated with cognitive worsening(23).

The Phase 3 trials of lanabecestat investigated in prodromal AD and mild AD (AMARANTH and DAYBREAK-ALZ respectively) were stopped due to futility(24). Prodromal individuals treated with the highest dose of lanabecestat significantly dropped out due to mood disorders and weight loss(24).

A Phase 2 trial of LY3202626 (3 or 12 mg/day) involving mild AD patients (NAVIGATE-AD) was discontinued according to the interim futility analysis(25).

The phase 2/3 umibecestat (CNP520) was investigated in asymptomatic at risk for AD, i.e. APOE  $\epsilon$ 4 allele carriers (GENERATION trial) (177). The study was conducted in either A $\beta$  positive or A $\beta$  negative individuals. However, it was discontinued due to higher rates of cognitive decline in the treatment group compared with the placebo(26).

The Phase 2 of elenbecestat (E2609), conducted in MCI-to-moderate AD participants showed significantly reduced A $\beta$  burden in the highest dose group compared with placebo.

On September 13, Eisai and Biogen announced the discontinuation of the Phase III clinical trials, MISSION AD 1 and 2, evaluating the efficacy and safety of 50 mg of elenbecestat in patients with early AD. The decision to end the trials was based on the results of a safety review conducted by the Data Safety Monitoring Board (DSMB), which recommended discontinuation of these trials due to an unfavourable risk-benefit ratio although the study did not achieve prespecified statistical criteria for significant cognitive worsening on elenbecestat (<https://www.alzforum.org/therapeutics/elenbecestat>).

## Supplemental References

1. Grimmer T, Alexopoulos P, Tsolakidou A, Guo L-H, Henriksen G, Yousefi BH, *et al.* (2012): Cerebrospinal fluid BACE1 activity and brain amyloid load in Alzheimer's disease. *ScientificWorldJournal* 2012: 712048.
2. Perneczky R, Alexopoulos P (2014): Cerebrospinal fluid BACE1 activity and markers of amyloid precursor protein metabolism and axonal degeneration in Alzheimer's disease. *Alzheimers Dement* 10: S425--S429.e1.
3. Alexopoulos P, Thierjung N, Grimmer T, Ortner M, Economou P, Assimakopoulos K, *et al.* (2018): Cerebrospinal Fluid BACE1 Activity and sAbetaPPbeta as Biomarker Candidates of Alzheimer's Disease. *Dement Geriatr Cogn Disord* 45: 152–161.
4. Zetterberg H, Andreasson U, Hansson O, Wu G, Sankaranarayanan S, Andersson ME, *et al.* (2008): Elevated cerebrospinal fluid BACE1 activity in incipient Alzheimer disease. *Arch Neurol* 65: 1102–1107.
5. Rosen C, Andreasson U, Mattsson N, Marcusson J, Minthon L, Andreasen N, *et al.* (2012): Cerebrospinal fluid profiles of amyloid beta-related biomarkers in Alzheimer's disease. *Neuromolecular Med* 14: 65–73.
6. Savage MJ, Holder DJ, Wu G, Kaplow J, Siuciak JA, Potter WZ (2015): Soluble BACE-1 Activity and sAbetaPPbeta Concentrations in Alzheimer's Disease and Age-Matched Healthy Control Cerebrospinal Fluid from the Alzheimer's Disease Neuroimaging Initiative-1 Baseline Cohort. *J Alzheimers Dis* 46: 431–440.
7. Zhong Z, Ewers M, Teipel S, Burger K, Wallin A, Blennow K, *et al.* (2007): Levels of beta-secretase (BACE1) in cerebrospinal fluid as a predictor of risk in mild cognitive impairment. *Arch Gen Psychiatry* 64: 718–726.
8. Kim J, Yoon H, Chung D-E, Brown JL, Belmonte KC, Kim J (2016): miR-186 is decreased in aged brain and suppresses BACE1 expression. *J Neurochem* 137: 436–445.
9. Ewers M, Cheng X, Zhong Z, Nural HF, Walsh C, Meindl T, *et al.* (2011): Increased CSF-BACE1 activity associated with decreased hippocampus volume in Alzheimer's disease. *J Alzheimers Dis* 25: 373–381.
10. Mulder SD, van der Flier WM, Verheijen JH, Mulder C, Scheltens P, Blankenstein MA, *et al.* (2010): BACE1 activity in cerebrospinal fluid and its relation to markers of AD pathology. *J Alzheimers Dis* 20: 253–260.
11. Barao S, Zhou L, Adamczuk K, Vanhoutvin T, van Leuven F, Demedts D, *et al.* (2013): BACE1 levels correlate with phospho-tau levels in human cerebrospinal fluid. *Curr Alzheimer Res* 10: 671–678.
12. De Vos A, Struyfs H, Jacobs D, Franssen E, Klewansky T, De Roeck E, *et al.* (2016): The Cerebrospinal Fluid Neurogranin/BACE1 Ratio is a Potential Correlate of Cognitive Decline in Alzheimer's Disease. *J Alzheimers Dis* 53: 1523–1538.
13. Timmers M, Barao S, Van Broeck B, Tesseur I, Slemmon J, De Waepenaert K, *et al.* (2017): BACE1

- Dynamics Upon Inhibition with a BACE Inhibitor and Correlation to Downstream Alzheimer's Disease Markers in Elderly Healthy Participants. *J Alzheimers Dis* 56: 1437–1449.
14. Schaevebeke J, Gille B, Adamczuk K, Vanderstichele H, Chassaing E, Bruffaerts R, *et al.* (2019): Cerebrospinal fluid levels of synaptic and neuronal integrity correlate with gray matter volume and amyloid load in the precuneus of cognitively intact older adults. *J Neurochem* 149: 139–157.
  15. Bermejo-Bescos P, Martin-Aragon S, Jimenez-Aliaga K, Benedi J, Felici E, Gil P, *et al.* (2013): Processing of the platelet amyloid precursor protein in the mild cognitive impairment (MCI). *Neurochem Res* 38: 1415–1423.
  16. Decourt B, Sabbagh MN (2011): BACE1 as a potential biomarker for Alzheimer's disease. *J Alzheimers Dis* 24 Suppl 2: 53–59.
  17. Marksteiner J, Humpel C (2013): Platelet-derived secreted amyloid-precursor protein-beta as a marker for diagnosing Alzheimer's disease. *Curr Neurovasc Res* 10: 297–303.
  18. Johnston JA, Liu WW, Coulson DTR, Todd S, Murphy S, Brennan S, *et al.* (2008): Platelet beta-secretase activity is increased in Alzheimer's disease. *Neurobiol Aging* 29: 661–668.
  19. McGuinness B, Fuchs M, Barrett SL, Passmore AP, Johnston JA (2016): Platelet Membrane beta-Secretase Activity in Mild Cognitive Impairment and Conversion to Dementia: a Longitudinal Study. *J Alzheimers Dis* 49: 1095–1103.
  20. Shen Y, Wang H, Sun Q, Yao H, Keegan AP, Mullan M, *et al.* (2018): Increased Plasma Beta-Secretase 1 May Predict Conversion to Alzheimer's Disease Dementia in Individuals With Mild Cognitive Impairment. *Biol Psychiatry* 83: 447–455.
  21. Manzine PR, Souza M da S, Cominetti MR (2016): BACE1 levels are increased in plasma of Alzheimer's disease patients compared with matched cognitively healthy controls. *Per Med* 13: 531–540.
  22. Egan MF, Kost J, Tariot PN, Aisen PS, Cummings JL, Vellas B, *et al.* (2018): Randomized Trial of Verubecestat for Mild-to-Moderate Alzheimer's Disease. *N Engl J Med* 378: 1691–1703.
  23. Henley D, Raghavan N, Sperling R, Aisen P, Raman R, Romano G (2019, April): Preliminary Results of a Trial of Atabecestat in Preclinical Alzheimer's Disease. *The New England Journal of Medicine*, vol. 380. pp 1483–1485.
  24. Strobel G (2019). BACE Inhibitors: Postmortem on One, Live Updates on Two. <https://www.alzforum.org/news/conference-coverage/bace-inhibitors-postmortem-one-live-updates-two>.
  25. Albert C Lo, Duggan Evans C, Mancini M, Lin Q, Wang H, Liu P, *et al.* (2018). Results from the Phase 2 NAVIGATE-AD clinical trial evaluating LY3202626 BACE inhibitor in patients with mild Alzheimer's disease dementia. CTAD 2018, Abstract LB1, page S37.
  26. Statement on discontinuation of BACE 1 inhibitor CNP520 in the Alzheimer's Prevention Initiative Generation Study 1. July 12, 2019. NIA Office of Communications & Public Liaison, 301-496-1752, [nianews3@mail.nih.gov](mailto:nianews3@mail.nih.gov).
